# Supplementary material for: Polymorphism Analysis of pfmdr1 and pfcrt from Plasmodium falciparum Isolates in Northwestern Nigeria Revealed the Major Markers Associated with Antimalarial Resistance
Source: Diseases. 2021 Jan 4;9(1):6. doi: 10.3390/diseases9010006 (PMC7838797; doi:10.3390/diseases9010006)
Supplement: Supplementary file 1 [file diseases-09-00006-s001.pdf]

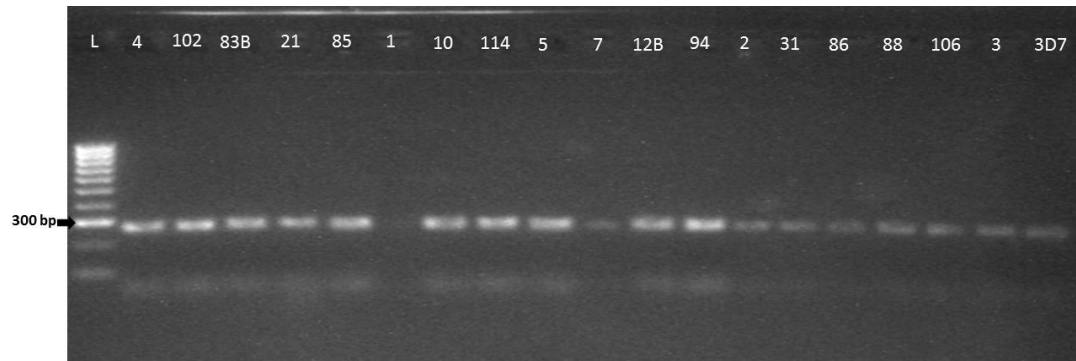

Figure S1: **Photomicrograph of agarose gel for COX III PCR.** HL is a DNA ladder (hyperladder 100 bp, Bioline, 100–1013 bp); lanes 1–18 shows a band of approximately 500 bp characteristics of COX III fragment of *P. falciparum*; lane 19 is for PF3D7 positive control gDNA

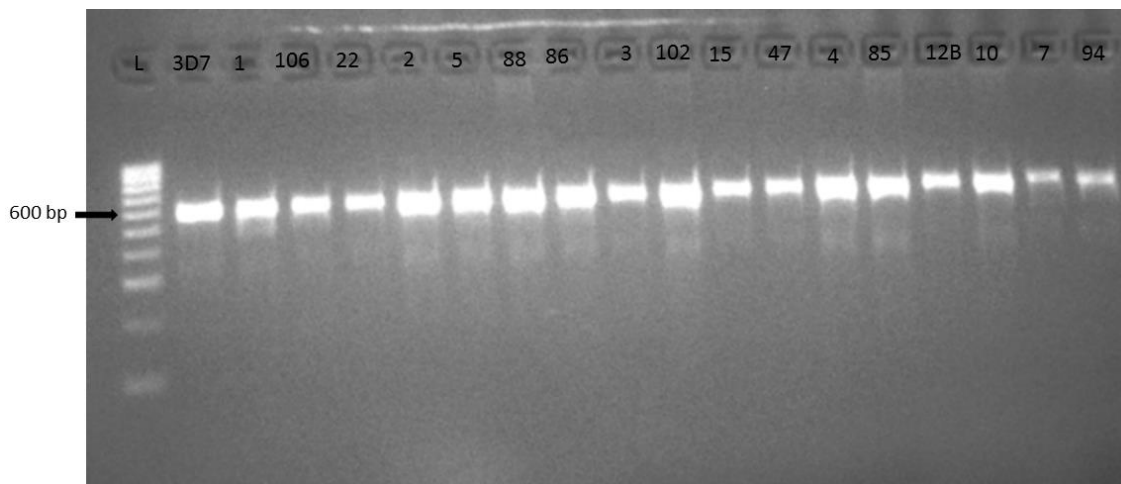

Figure S2: **Comparison of sequences of *pfmdr1* of field isolates and PF3D7.** Residues affected by mutations are highlighted in grey, with isolate MM106 exhibiting double mutations, 86Y and 184F

|            |            |            |            |                   |                |         |
|------------|------------|------------|------------|-------------------|----------------|---------|
|            |            |            | 20         |                   | 40             |         |
| >pf3D7_CRT | NGSRLGGGSC | LGKCAHVFKL | IFKEIKDNIF | IYILSIIYLS        | VCVMNKK        | IFAK 50 |
| >MM106_CRT | NGSRLGGGSC | LGKCAHVFKL | IFKEIKENIF | IYILSIIYLS        | VCV <b>IET</b> | IFAK 50 |
| >MM12B_CRT | NGSRLGGGSC | LGKCAHVFKL | IFKEIKENIF | IYILSIIYLS        | VCV <b>IET</b> | IFAK 50 |
| >MM21_CRT  | NGSRLGGGSC | LGKCAHVFKL | IFKEIKDNIF | IYILSIIYLS        | VCVM <b>ET</b> | IFAK 50 |
| >MM1_CRT   | NGSRLGGGSC | LGKCAHVFKL | IFKEIKDNIF | IYILSIIYLS        | VCVMNKK        | IFAK 50 |
| >MM5_CRT   | NGSRLGGGSC | LGKCAHVFKL | IFKEIKDNIF | IYILSIIYLS        | VCVMNKK        | IFAK 50 |
|            |            | 60         |            | 80                |                |         |
| >pf3D7_CRT | RTLNKIGNYS | FVTSETHNF  | CMIMFFIVYS | LFGNKKGNS         |                | 89      |
| >MM106_CRT | RTLNKIGNYS | FVTSETHNF  | CMIMFFIVYS | LFGNKKGNS         |                | 89      |
| >MM12B_CRT | RTLNKIGNYS | FVTSETHNF  | CMIMFFIVYS | LFGNKKGNS         |                | 89      |
| >MM21_CRT  | RTLNKIGNYS | FVTSETHNF  | CMIMFFIVYS | LFGNKKGNS         |                | 89      |
| >MM1_CRT   | RTLNKIGNYS | FVTSETHNF  | CMIMFFIVYS | LFGN <b>K</b> GNS |                | 89      |
| >MM5_CRT   | RTLNKIGNYS | FVTSETHNF  | CMIMFFIVYS | LFGN <b>K</b> GNS |                | 89      |

Figure S3: **Comparison of sequences of *pfCRT* of field isolates and PF3D7.** Residues affected by mutations are highlighted in grey, with MM106 and MM12B exhibiting D57E mutation, in addition

to being a CVIET haplotype.

```

      20      40      60      80
> pf3D7  EKKDGNLSIK EEVEKELNKK STAELFRKIK NEKISFFLPP KCLPAQHRKL LFISFVCAVL SGGTLPFFIS VFGVILKNMN 80
> MM85  EKKDGNLSIK EEVEKELNKK STAELFRKIK NEKISFFLPP KCLPAQHRKL LFISFVCAVL SGGTLPFFIS VFGVILKNMN 80
> MM88  EKKDGNLSIK EEVEKELNKK STAELFRKIK NEKISFFLPP KCLPAQHRKL LFISFVCAVL SGGTLPFFIS VFGVILKNMN 80
> MM94  EKKDGNLSIK EEVEKELNKK STAELFRKIK NEKISFFLPP KCLPAQHRKL LFISFVCAVL SGGTLPFFIS VFGVILKNMN 80
> MM102 EKKDGNLSIK EEVEKELNKK STAELFRKIK NEKISFFLPP KCLPAQHRKL LFISFVCAVL SGGTLPFFIS VFGVILKNMN 80
> MM106 EKKDGNLSIK EEVEKELNKK STAELFRKIK NEKISFFLPP KCLPAQHRKL LFISFVCAVL SGGTLPFFIS VFGVILKNMN 80

      100     120     140     160
> pf3D7  LGDDINPIIL SLVSIQGLVQF ILSMISSYCM DVITSKILKT LKLEYLRSVF YQDQGQFHDNN PGSKLRSDLD FYLEQVSSGI 160
> MM85  LGDDINPIIL SLVSIQGLVQF ILSMISSYCM DVITSKILKT LKLEYLRSVF YQDQGQFHDNN PGSKLRSDLD FYLEQVSSGI 160
> MM88  LGDDINPIIL SLVSIQGLVQF ILSMISSYCM DVITSKILKT LKLEYLRSVF YQDQGQFHDNN PGSKLRSDLD FYLEQVSSGI 160
> MM94  LGDDINPIIL SLVSIQGLVQF ILSMISSYCM DVITSKILKT LKLEYLRSVF YQDQGQFHDNN PGSKLRSDLD FYLEQVSSGI 160
> MM102 LGDDINPIIL SLVSIQGLVQF ILSMISSYCM DVITSKILKT LKLEYLRSVF YQDQGQFHDNN PGSKLRSDLD FYLEQVSSGI 160
> MM106 LGDDINPIIL SLVSIQGLVQF ILSMISSYCM DVITSKILKT LKLEYLRSVF YQDQGQFHDNN PGSKLRSDLD FYLEQVSSGI 160

      180     200
> pf3D7  GTKFITIFTY ASSFLGLFIW SLIKNARLTL CITCVFPLIY VCG 203
> MM85  GTKFITIFTY ASSFLGLFIW SLIKNARLTL CITCVFPLIY VCG 203
> MM88  GTKFITIFTY ASSFLGLFIW SLIKNARLTL CITCVFPLIY VCG 203
> MM94  GTKFITIFTY ASSFLGLFIW SLIKNARLTL CITCVFPLIY VCG 203
> MM102 GTKFITIFTY ASSFLGLFIW SLIKNARLTL CITCVFPLIY VCG 203
> MM106 GTKFITIFTY ASSFLGLFIW SLIKNARLTL CITCVFPLIY VCG 203

```

Figure S4: Photomicrograph of agarose gel for *pfmdr1*. L is a DNA ladder (hyperladder 100 bp, Bioline, 100–1013 bp); lane 2 is PF3D7 positive control gDNA, and 3–18 show bands of approximately 610 bp, characteristic of the *pfmdr1* fragment encompassing the 86<sup>th</sup> and 184<sup>th</sup> codons.

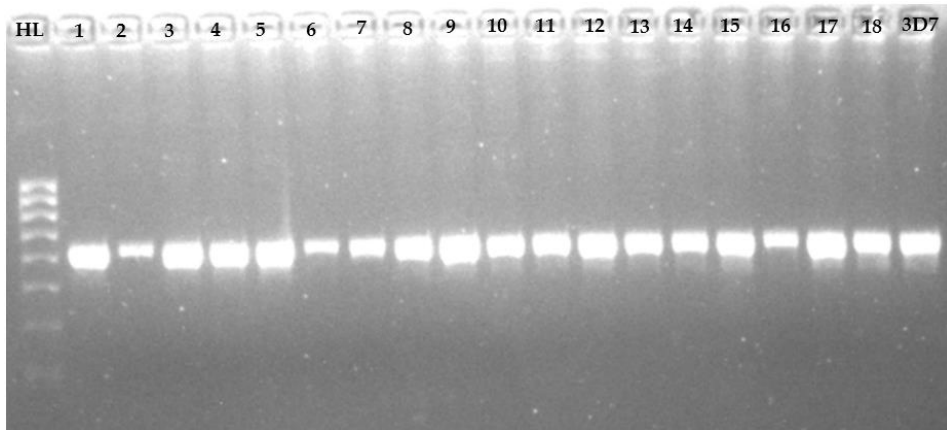

Figure S5: Photomicrograph of agarose gel for *pfprt*. L is a DNA ladder (hyperladder 100 bp, Bioline, 100–1013 bp); lanes 2–19 are 267 bp *pfprt* fragments encompassing codons 72–76; lane 20 is for PF3D7 positive control gDNA.
